# Supplementary material for: Evaluation of exosomal miRNAs as potential diagnostic biomarkers for acute myocardial infarction using next-generation sequencing
Source: PubMed Central journal article supplement — Ann Transl Med. 2021 Feb;9(3):219. doi: 10.21037/atm-20-2337 (PMC7940945; doi:10.21037/atm-20-2337), 2021-02
Supplement: atm-09-03-219-dss.pdf [file atm-09-03-219-dss.pdf]

## Data Sharing Statement

|                     |                                                                                                                                                    |                                                                                                                                                                                                                                          |
|---------------------|----------------------------------------------------------------------------------------------------------------------------------------------------|------------------------------------------------------------------------------------------------------------------------------------------------------------------------------------------------------------------------------------------|
| <b>Article Info</b> | <a href="http://dx.doi.org/10.21037/atm-20-2337">http://dx.doi.org/10.21037/atm-20-2337</a>                                                        |                                                                                                                                                                                                                                          |
| <b>Item</b>         | <b>Question</b>                                                                                                                                    | <b>Authors' Response<br/>(place "-" if not applicable)</b>                                                                                                                                                                               |
| 1                   | Would you like to share data collected for your study to others?                                                                                   | I will share most data collected for my study for others. But except the individual participant data, including original sequencing data, clean data of small RNA sequencing will not be shared to others.                               |
| 2                   | If not, would you like to share the reason for your decision?                                                                                      | According to policies and guidelines on the sharing of genetic resource data in China, the individual participant data, including original sequencing data, clean data of small RNA sequencing are not allowed to share internationally. |
| 3                   | What data in particular will be shared?                                                                                                            | The normalized miRNA expression level of all subjects                                                                                                                                                                                    |
| 4                   | Any other documents will be share? Such as study protocol, statistical analysis plan, informed consent form, clinical study report, analytic code. | Study protocol, statistical analysis plan, informed consent form, analytic code will be shared if requested.                                                                                                                             |
| 5                   | When will data availability begin?                                                                                                                 | -                                                                                                                                                                                                                                        |
| 6                   | When will data availability end?                                                                                                                   | -                                                                                                                                                                                                                                        |
| 7                   | To whom will you share the data?                                                                                                                   | -                                                                                                                                                                                                                                        |
| 8                   | For what type of analysis or purpose?                                                                                                              | -                                                                                                                                                                                                                                        |
| 9                   | How or where can the data/documents be obtained?                                                                                                   | The data have been deposited into the CNGB database. The link will be available before publication.                                                                                                                                      |
| 10                  | Any other restrictions?                                                                                                                            | -                                                                                                                                                                                                                                        |
