# Supplementary material for: Evaluation of exosomal miRNAs as potential diagnostic biomarkers for acute myocardial infarction using next-generation sequencing
Source: PubMed Central journal article supplement — Ann Transl Med. 2021 Feb;9(3):219. doi: 10.21037/atm-20-2337 (PMC7940945; doi:10.21037/atm-20-2337), 2021-02
Supplement: atm-09-03-219-supplementary.pdf [file atm-09-03-219-supplementary.pdf]

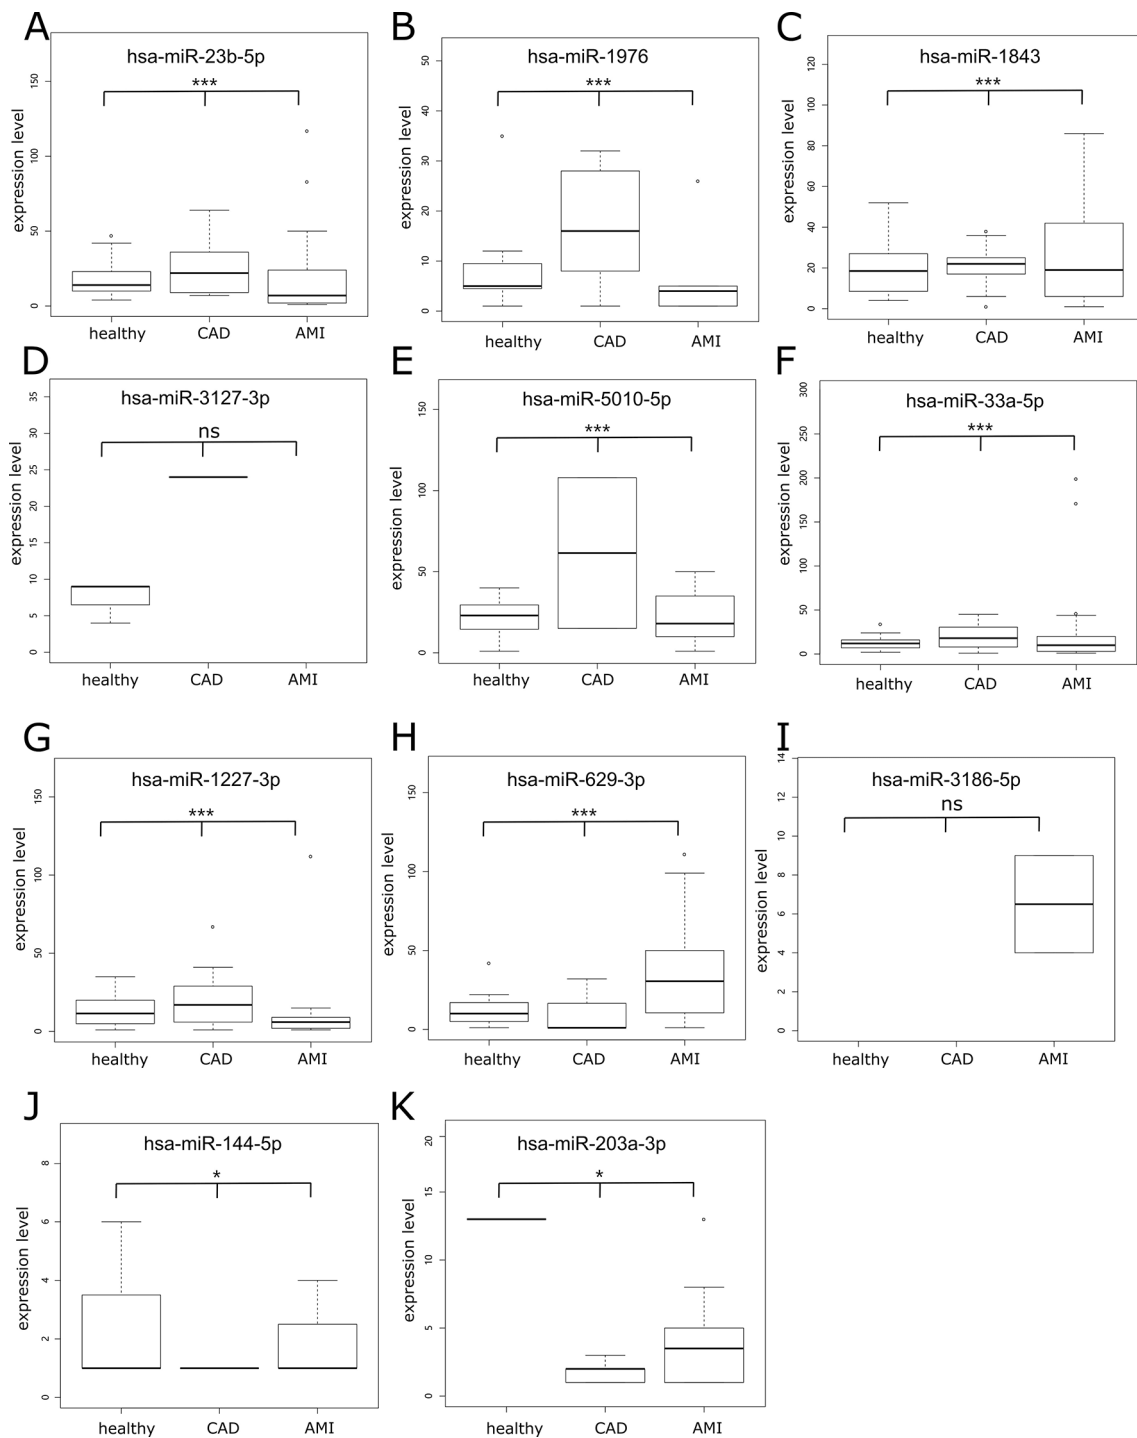

**Figure S1** Expression level of 11 miRNA markers in the three groups using linear regression and AONOVA, \*, P<0.05; \*\*, P<0.01; ns, P>0.05. Since the RF model can use non-linear correlation between the marker and the phenotype for classification prediction, it was normal to observe insignificant differences in linear regression analysis for some markers such as hsa-miR-3127-3p and hsa-miR-3186-5p.

**Table S1** 2 × 2 contingency table

| Phenotype | Prediction |         |     |
|-----------|------------|---------|-----|
|           | AMI        | Control | Sum |
| AMI       | 8          | 3       | 11  |
| control   | 2          | 9       | 11  |
| sum       | 10         | 12      | 22  |

**Table S2** RF\_Importance of 41 miRNAs

| miRNA            | Mean decrease accuracy |
|------------------|------------------------|
| hsa-miR-1180-3p  | 17.19                  |
| hsa-miR-3615     | 14.84                  |
| hsa-miR-1227-3p  | 11.98                  |
| hsa-miR-5010-5p  | 11.95                  |
| hsa-let-7i-5p    | 8.61                   |
| hsa-miR-629-3p   | 5.74                   |
| hsa-miR-1976     | 5.10                   |
| hsa-miR-106b-5p  | 4.38                   |
| hsa-miR-143-3p   | 4.13                   |
| hsa-miR-23b-5p   | 3.03                   |
| hsa-miR-1843     | 2.90                   |
| hsa-miR-33a-5p   | 2.09                   |
| hsa-miR-3186-5p  | 1.70                   |
| hsa-miR-17-5p    | 1.64                   |
| hsa-miR-3127-3p  | 1.50                   |
| hsa-miR-1273h-3p | 1.44                   |
| hsa-miR-144-5p   | 0.24                   |
| hsa-miR-203a-3p  | 0.09                   |
| hsa-miR-4638-3p  | 0.00                   |
| hsa-miR-1285-3p  | 0.00                   |
| hsa-miR-1343-5p  | 0.00                   |
| hsa-miR-5001-3p  | 0.00                   |
| hsa-miR-5589-5p  | 0.00                   |
| hsa-miR-4755-3p  | 0.00                   |
| hsa-miR-301b-5p  | 0.00                   |
| hsa-miR-6724-5p  | 0.00                   |
| hsa-miR-4724-5p  | 0.00                   |
| hsa-miR-135b-3p  | 0.00                   |
| hsa-miR-3189-3p  | 0.00                   |
| hsa-miR-141-5p   | 0.00                   |
| hsa-miR-4700-5p  | 0.00                   |
| hsa-miR-222-5p   | -0.05                  |
| hsa-miR-1271-5p  | -0.39                  |
| hsa-miR-31-5p    | -0.72                  |
| hsa-miR-1908-3p  | -0.94                  |
| hsa-miR-548q     | -1.00                  |
| hsa-miR-365b-5p  | -1.00                  |
| hsa-miR-1296-5p  | -1.41                  |
| hsa-miR-210-3p   | -1.90                  |
| hsa-miR-17-3p    | -1.92                  |
| hsa-miR-664b-3p  | -3.59                  |
